# Supplementary material for: Learning shapes the aversion and reward responses of lateral habenula neurons
Source: eLife journal article supplement (doi:10.7554/elife.23045), 2017-05-31
Supplement: supp [file elife-23045-supp-v2.zip]

Archive with 9 entries (9 files):
- elife_poa_e23045_Supplementary_File_1.pdf
- elife_poa_e23045_Video_1.mp4
- elife_poa_e23045_Figure_2_figure_supplement_1.pdf
- elife_poa_e23045_Figure_5_figure_supplement_1.pdf
- elife_poa_e23045_Figure_3_figure_supplement_1.pdf
- elife_poa_e23045_Figure_1_figure_supplement_1.pdf
- elife_poa_e23045_Figure_5_figure_supplement_2.pdf
- elife_poa_e23045_Figure_7_figure_supplement_1.pdf
- elife_poa_e23045_Figure_4_figure_supplement_1.pdf
