# Supplementary material for: Learning shapes the aversion and reward responses of lateral habenula neurons
Source: eLife journal article supplement (doi:10.7554/elife.23045), 2017-05-31
Supplement: supp [file elife-23045-supp-v2.zip › elife_poa_e23045_Supplementary_File_1.pdf]

| Figure        | Sample size          | Statistical test                                                                          | <i>p</i> Values                                                              |
|---------------|----------------------|-------------------------------------------------------------------------------------------|------------------------------------------------------------------------------|
| 1H; 1I        | GCaMP6:7             | Multivariate Permutation test; 1000 permutations; Alpha level: 0.05                       | $p < 0.05$                                                                   |
| 1M; 1N        | GCaMP6:8             | Multivariate Permutation test; 1000 permutations; Alpha level: 0.05                       | $p < 0.05$                                                                   |
| 2C; 2D        | GCaMP6:7             | Multivariate Permutation test; 1000 permutations; Alpha level: 0.05                       | $p < 0.05$                                                                   |
| 2G; 2H        | GCaMP6:6             | Multivariate Permutation test; 1000 permutations; Alpha level: 0.05                       | $p < 0.05$                                                                   |
| 3C; 3D cue    | GCaMP6:9             | Dunnett's multiple comparisons test with Geisser-Greenhouse correction; Alpha level: 0.05 | $p = 0.0059$<br>$p = 0.0005$<br>$p = 0.0041$                                 |
| 3D quinine    | GCaMP6:9             | Dunnett's multiple comparisons test with Geisser-Greenhouse correction; Alpha level: 0.05 | $p = 0.7835$<br>$p = 0.5414$<br>$p = 0.3948$                                 |
| 3G; 3H cue    | GCaMP6:9             | Dunnett's multiple comparisons test with Geisser-Greenhouse correction; Alpha level: 0.05 | $p < 0.0001$<br>$p = 0.0048$<br>$p = 0.0019$                                 |
| 3H foot-shock | GCaMP6:9             | Dunnett's multiple comparisons test with Geisser-Greenhouse correction; Alpha level: 0.05 | $p = 0.1846$<br>$p = 0.4436$<br>$p = 0.0905$                                 |
| 3K; 3L cue    | GCaMP6:9             | Dunnett's multiple comparisons test with Geisser-Greenhouse correction; Alpha level: 0.05 | $p = 0.4036$<br>$p = 0.0318$<br>$p = 0.0479$<br>$p = 0.0359$<br>$p = 0.0429$ |
| 3L omission   | GCaMP6:9             | Dunnett's multiple comparisons test with Geisser-Greenhouse correction; Alpha level: 0.05 | $p = 0.7141$<br>$p > 0.9999$<br>$p = 0.9988$<br>$p = 0.9997$<br>$p > 0.9999$ |
| 4C; 4D        | GCaMP6:6             | Multivariate Permutation test; 1000 permutations; Alpha level: 0.05                       | $p < 0.05$                                                                   |
| 4F; 4G        | GCaMP6:6             | Multivariate Permutation test; 1000 permutations; Alpha level: 0.05                       | $p < 0.05$                                                                   |
| 5B; 5D        |                      | Multivariate Permutation test; 1000 permutations; Alpha level: 0.05                       | $p < 0.05$                                                                   |
| 5E; 5F        | GCaMP6: 9            | Multivariate Permutation test; 1000 permutations; Alpha level: 0.05                       | $p < 0.05$                                                                   |
| 5G Type II    | GCaMP6: 9            | Dunnett's multiple comparisons test with Geisser-Greenhouse correction; Alpha level: 0.05 | $p = 0.0166$<br>$p = 0.0002$<br>$p < 0.0001$                                 |
| 5G Type I     | GCaMP6: 9            | Dunnett's multiple comparisons test with Geisser-Greenhouse correction; Alpha level: 0.05 | $p = 0.0300$<br>$p = 0.0044$<br>$p < 0.0001$                                 |
| 5H Type II    | GCaMP6: 9            | Dunnett's multiple comparisons test with Geisser-Greenhouse correction; Alpha level: 0.05 | $p = 0.0792$<br>$p = 0.0009$<br>$p = 0.0002$                                 |
| 5H Type I     | GCaMP6: 9            | Dunnett's multiple comparisons test with Geisser-Greenhouse correction; Alpha level: 0.05 | $p = 0.0681$<br>$p = 0.0009$<br>$p = 0.0003$                                 |
| 5I Type II    | GCaMP6: 9            | Dunnett's multiple comparisons test with Geisser-Greenhouse correction; Alpha level: 0.05 | $p = 0.2963$<br>$p = 0.0183$<br>$p = 0.0002$                                 |
| 5I Type I     | GCaMP6: 9            | Dunnett's multiple comparisons test with Geisser-Greenhouse correction; Alpha level: 0.05 | $p = 0.9795$<br>$p = 0.8607$<br>$p = 0.9303$                                 |
| 6A-6D         |                      | Multivariate Permutation test; 1000 permutations; Alpha level: 0.05                       | $p < 0.05$                                                                   |
| 6E-6H         | GCaMP6: 7            | Multivariate Permutation test; 1000 permutations; Alpha level: 0.05                       | $p < 0.05$                                                                   |
| 7D            |                      | Multivariate Permutation test; 1000 permutations; Alpha level: 0.05                       | $p < 0.05$                                                                   |
| 7F; 7G        | Chr2: 12; 70 neurons | Multivariate Permutation test; 1000 permutations; Alpha level: 0.05                       | $p < 0.05$                                                                   |

|                                |                      |                                                                                           |                                                                              |
|--------------------------------|----------------------|-------------------------------------------------------------------------------------------|------------------------------------------------------------------------------|
| Fig 1 – S1A; S1B               | EmGFP:5              | Multivariate Permutation test; 1000 permutations; Alpha level: 0.05                       | $p < 0.05$                                                                   |
| Fig 2 – S1C; S1D               | EmGFP:4              | Multivariate Permutation test; 1000 permutations; Alpha level: 0.05                       | $p < 0.05$                                                                   |
| Fig 3 – S1B; footshock         | GCaMP6:5             | Dunnett's multiple comparisons test with Geisser-Greenhouse correction; Alpha level: 0.05 | $p = 0.0287$<br>$p = 0.0069$<br>$p = 0.0146$                                 |
| Fig 3 – S1D; extinction effect | GCaMP6:5             | Dunnett's multiple comparisons test with Geisser-Greenhouse correction; Alpha level: 0.05 | $p = 0.9914$<br>$p = 0.7429$<br>$p = 0.0943$<br>$p = 0.0225$<br>$p = 0.0017$ |
| Fig 4 – S1; after defeat       | GCaMP6:6             | Dunnett's multiple comparisons test with Geisser-Greenhouse correction; Alpha level: 0.05 | $p = 0.0941$<br>$p = 0.0772$<br>$p = 0.0040$<br>$p = 0.0041$                 |
| Fig 4 – S1; before defeat      | GCaMP6:6             | Dunnett's multiple comparisons test with Geisser-Greenhouse correction; Alpha level: 0.05 | $p = 0.2389$<br>$p = 0.0886$<br>$p = 0.0567$<br>$p = 0.2675$                 |
| Fig 4 – S1; inter-groups       | GCaMP6:6             | t-test corrected for multiple comparisons using the Holm-Sidak method; Alpha level: 0.05  | $p = 0.0007$<br>$p = 0.0103$<br>$p = 0.0623$<br>$p = 0.4079$<br>$p = 0.0584$ |
| Fig 5 – S1D                    | GCaMP6:6             | Multivariate Permutation test; 1000 permutations; Alpha level: 0.05                       | $p < 0.05$                                                                   |
| Fig 5 – S2D                    | GCaMP6:7             |                                                                                           |                                                                              |
| Fig 7 – S1C                    | Chr2: 12; 70 neurons | Multivariate Permutation test; 1000 permutations; Alpha level: 0.05                       | $p < 0.05$                                                                   |
