# Supplementary figures and images for: Learning shapes the aversion and reward responses of lateral habenula neurons
Source: eLife journal article supplement (doi:10.7554/elife.23045), 2017-05-31

**A**

social attack, EmGFP

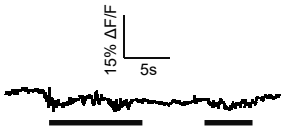**B**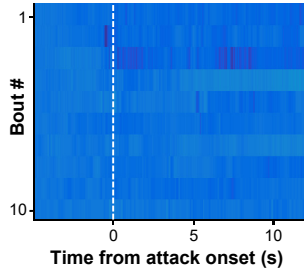**C**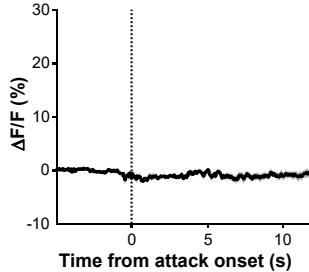**D**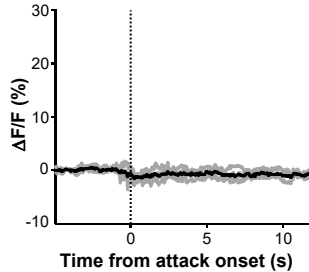

Supplement: supp [file elife-23045-supp-v1.zip]

**A**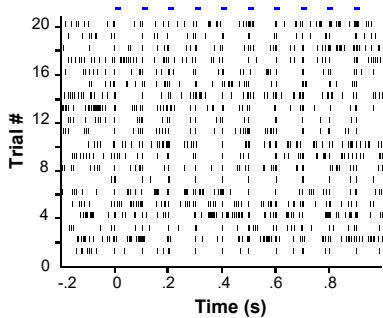**B**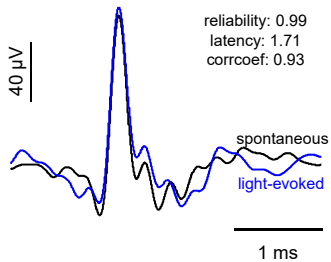**C**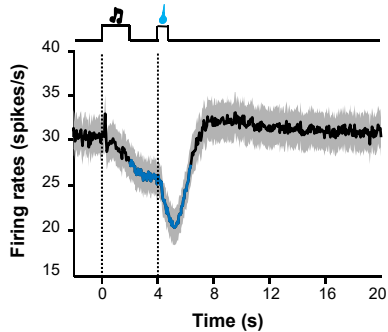

Supplement: supp [file elife-23045-supp-v1.zip]

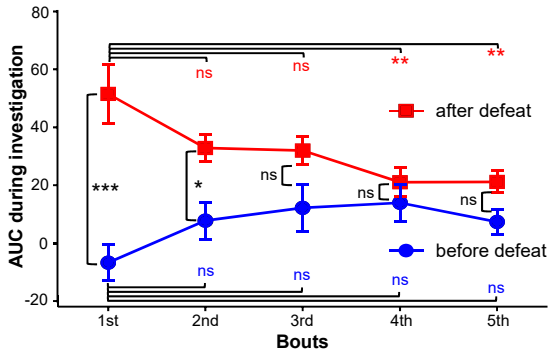

Supplement: supp [file elife-23045-supp-v1.zip]

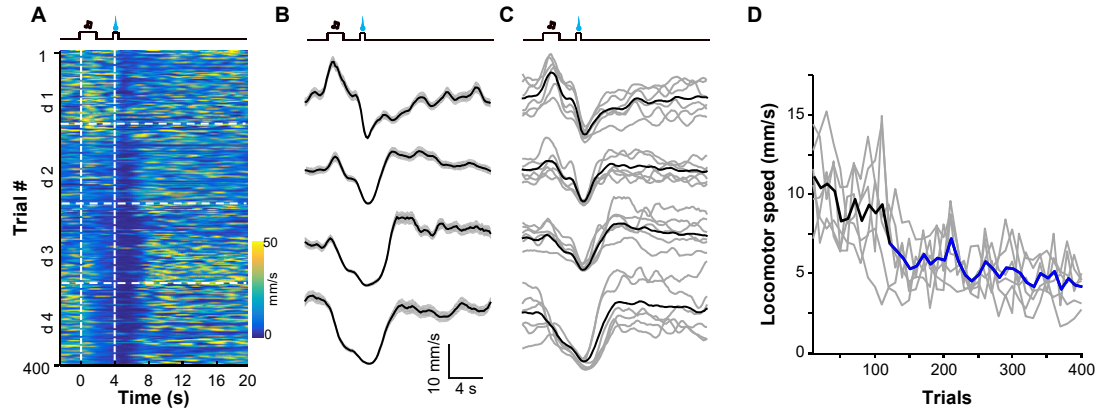

Supplement: supp [file elife-23045-supp-v1.zip]

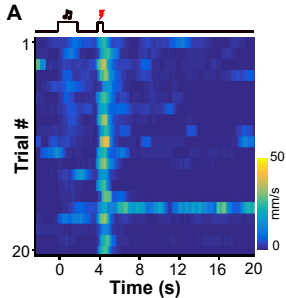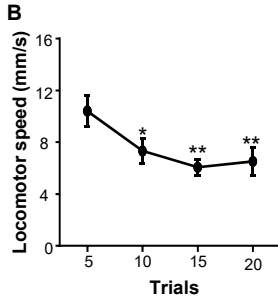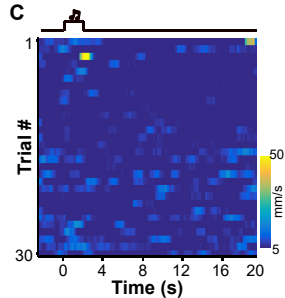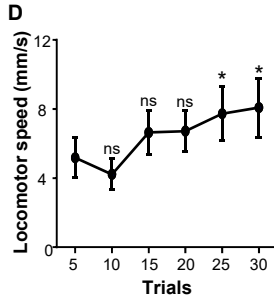

Supplement: supp [file elife-23045-supp-v1.zip]

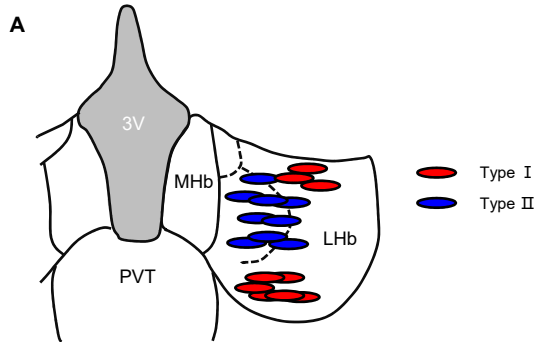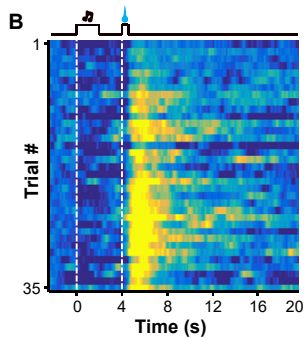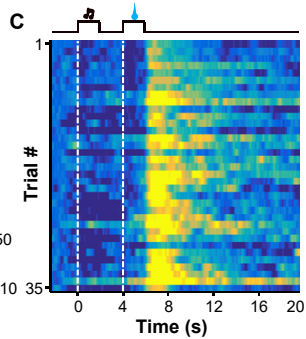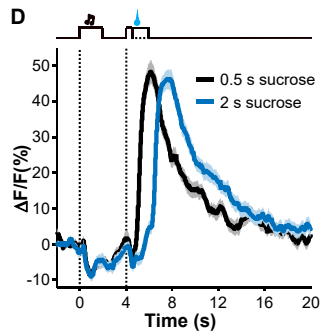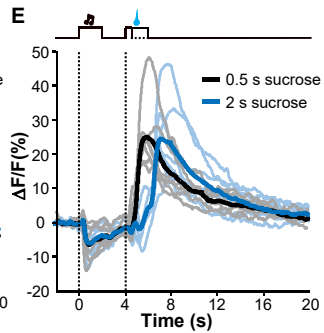

Supplement: supp [file elife-23045-supp-v1.zip]

**A**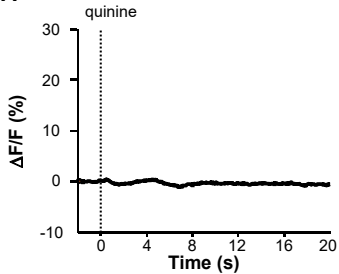**B**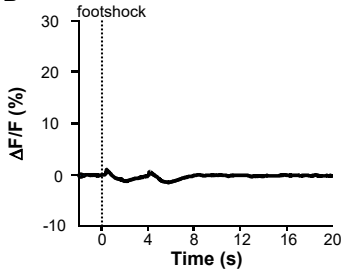

Supplement: supp [file elife-23045-supp-v1.zip]

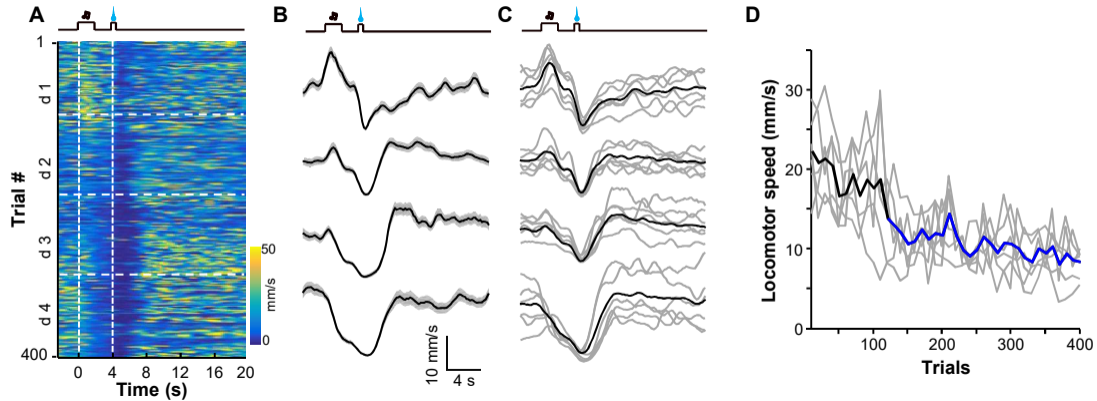

Supplement: supp [file elife-23045-supp-v2.zip › elife_poa_e23045_Figure_5_figure_supplement_1.pdf]

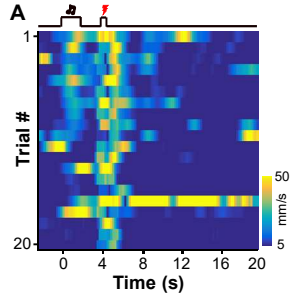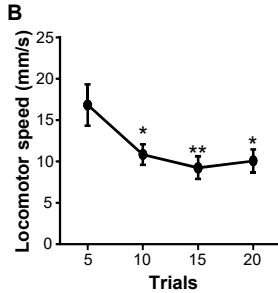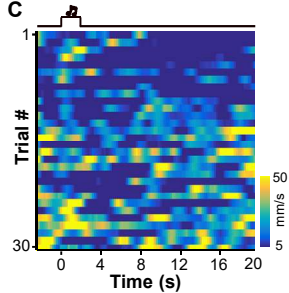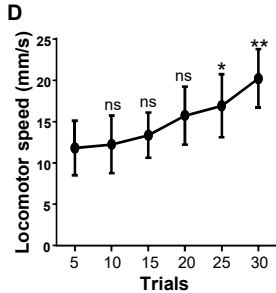

Supplement: supp [file elife-23045-supp-v2.zip › elife_poa_e23045_Figure_3_figure_supplement_1.pdf]

**A**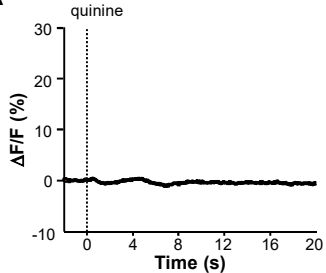**B**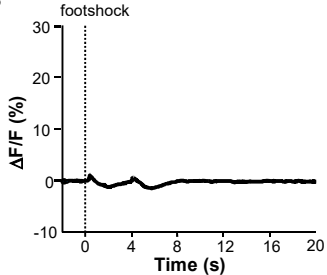

Supplement: supp [file elife-23045-supp-v2.zip › elife_poa_e23045_Figure_1_figure_supplement_1.pdf]

**A**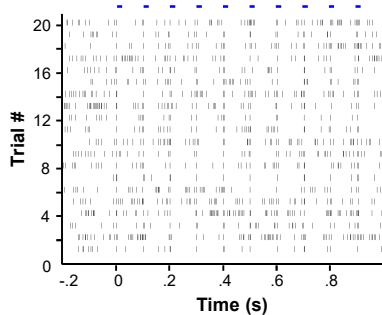**B**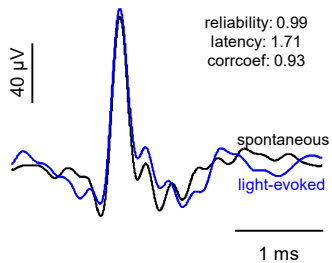**C**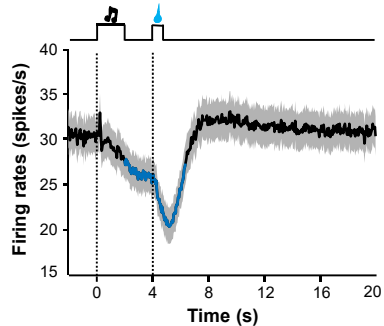

Supplement: supp [file elife-23045-supp-v2.zip › elife_poa_e23045_Figure_7_figure_supplement_1.pdf]
